# Supplementary material for: The impact of environmental factors in pre-hospital thermistor-based tympanic temperature measurement: a pilot field study
Source: Springer Nature journal article supplement (doi:10.1186/s13049-015-0148-5), 2015-09-23
Supplement: MOESM1 [file 9778952]

**Additional file 1**

**Signed rank test for  $\Delta T_{t ymp} - T_{t ympbaseline}$  at 0, 5 and 10 min**

|                         | <b>Baseline</b>   | <b>0 min</b>            | <b>5 min</b>            | <b>10 min</b>           |
|-------------------------|-------------------|-------------------------|-------------------------|-------------------------|
|                         | Median [Range]    | Median [Range] p-val    | Median [Range] p-val    | Median [Range] p-val    |
| <b>A. Wind (Ins -)</b>  | 36.5 [36.0, 37.5] | 26.4 [11.0, 36.2] 0.000 | 35.8 [34.8, 36.7] 0.006 | 36.0 [35.3, 37.0] 0.021 |
| <b>B. Wind (Ins +)</b>  | 36.5 [36.0, 37.5] | 32.0 [ 8.5, 36.8] 0.000 | 35.8 [34.2, 37.2] 0.004 | 36.2 [35.2, 37.4] 0.071 |
| <b>C. Snow (Ins +)</b>  | 36.5 [36.0, 37.5] | 12.5 [ 8.9, 26.8] 0.000 | 34.3 [32.3, 35.5] 0.000 | 35.4 [34.4, 36.7] 0.002 |
| <b>D. Water (Ins +)</b> | 36.5 [36.0, 37.5] | 15.4 [10.2, 23.8] 0.000 | 34.5 [32.2, 36.4] 0.000 | 35.5 [33.9, 36.7] 0.000 |
