# Supplementary material for: The impact of environmental factors in pre-hospital thermistor-based tympanic temperature measurement: a pilot field study
Source: Springer Nature journal article supplement (doi:10.1186/s13049-015-0148-5), 2015-09-23
Supplement: MOESM2 [file 9778952]

## Additional file 2

### Concordance correlation coefficients for $\Delta T_{rect-tymp}$

|                        | <b>Baseline</b> | <b>0 min</b> | <b>5 min</b> | <b>10 min</b> |
|------------------------|-----------------|--------------|--------------|---------------|
| <b>A. Wind (ins-)</b>  | 0,0523          | -0,0044      | 0,0088       | -0,0021       |
| <b>B. Wind (ins+)</b>  | 0,0461          | 0,0008       | -0,0190      | -0,0114       |
| <b>C. Snow (ins+)</b>  | 0,0627          | 0,0018       | 0,0165       | 0,0367        |
| <b>D. Water (ins+)</b> | 0,0505          | 0,0007       | 0,0030       | 0,0184        |
